# Supplementary material
Source: Springer Nature journal article supplement (https://www.springermedizin.de/resource/supplementary/12968_2013_3357_MOESM3_ESM.pdf/9583488)
Supplement: MOESM3 [file 9583488]

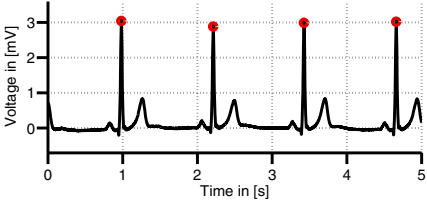

(a) Lead II, outside

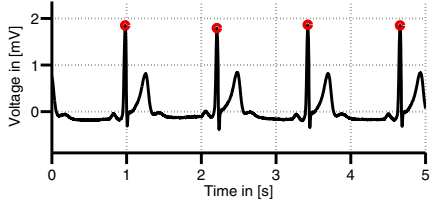

(b) Lead V3, outside

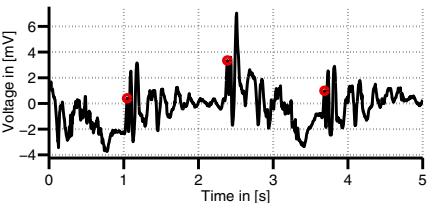

(c) Lead II, inside, Ff

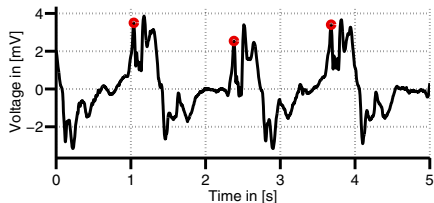

(d) Lead V3, inside, Ff

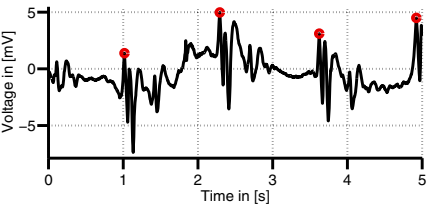

(e) Lead II, inside, Hf

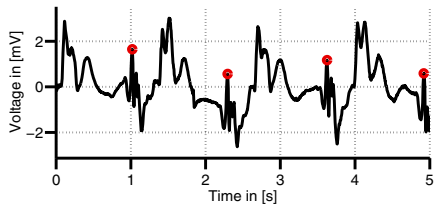

(f) Lead V3, inside, Hf
